# Supplementary material for: Cost-effective oxygen flask combustion and electrothermal vaporization capacitively coupled plasma microtorch optical emission spectrometry as a green and white method for multielemental determination in food
Source: Royal Society of Chemistry journal article supplement (doi:10.1039/d5ja00297d), 2025-11-18
Supplement: d5ja00297d1.pdf [file d5ja00297d1.pdf]

## Supplementary Information

### Cost-effective oxygen flask combustion and electrothermal vaporization capacitively coupled plasma microtorch optical emission spectrometry as green and white method for multielemental determination in food

Augustin Catalin Mot,<sup>a</sup> Adrian-Ioan Dudu,<sup>a,b</sup> Tiberiu Frentiu,<sup>a,c</sup> Dorin Petreus,<sup>d</sup> Erika-Andrea Levei,<sup>e</sup> Zamfira Stupar,<sup>e</sup> Maria Frentiu,<sup>e</sup> Eniko Covaci<sup>a,c,\*</sup>

<sup>a</sup> Babeş-Bolyai University, Faculty of Chemistry and Chemical Engineering, Arany Janos 11, 400028 Cluj-Napoca, Romania, eniko.covaci@ubbcluj.ro;

<sup>b</sup> Enzymology and Applied Biocatalysis Research Center, Faculty of Chemistry and Chemical Engineering, Babeş-Bolyai University, Arany Janos 11, 400028, Cluj-Napoca, Romania

<sup>c</sup> Babeş-Bolyai University, Research Center for Advanced Analysis, Instrumentation and Chemometrics, Arany Janos 11, 400028 Cluj-Napoca, Romania;

<sup>d</sup> Technical University of Cluj-Napoca, Faculty of Electronics, Telecommunications and Information Technology, Gheorghe Baritiu 26-28, 400027 Cluj-Napoca, Romania;

<sup>e</sup> National Institute for Research and Development of Optoelectronics INOE 2000, Research Institute for Analytical Instrumentation subsidiary, Donath 67, 400293 Cluj-Napoca, Romania

This online resource contains the following data:

1. Total carbon, total inorganic carbon and total organic carbon fractions in the solid food samples and absorbing liquid/suspension after oxygen flask combustion
2. Calibration curves obtained by SSETV- $\mu$ CCP-OES method for different number of integrating pixels of the signal over the spectral line profile
3. Dependence of signal-to-background ratio, relative standard deviation of the background and LODs *versus* the number of integrating pixels of the signal over the spectral line profile
4. Colours of the (OFC)-SSETV- $\mu$ CCP-OES method in comparison with traditional spectrometric methods

**1. Total carbon, total inorganic carbon and total organic carbon fractions in the solid food samples and absorbing liquid/suspension after oxygen flask combustion**

**Table S1.** Concentration of total carbon (TC), total inorganic carbon (TIC) and total organic carbon (TOC) in food sample and absorbing liquid/suspension

| Sample                           | Carbon fractions in food sample ± SD <sup>a</sup><br>(μg mg <sup>−1</sup> ) |          |          | Carbon fraction in liquid sample/suspension<br>after combustion ± SD <sup>a</sup> (μg mL <sup>−1</sup> ) |            |            | Combustion<br>efficiency (%) <sup>b</sup> |
|----------------------------------|-----------------------------------------------------------------------------|----------|----------|----------------------------------------------------------------------------------------------------------|------------|------------|-------------------------------------------|
|                                  | TC                                                                          | TIC      | TOC      | TC                                                                                                       | TIC        | TOC        |                                           |
| CRMs                             |                                                                             |          |          |                                                                                                          |            |            |                                           |
| Tort-3 (Lobster hepatopancreas)  | 482 ± 15                                                                    | 158 ± 27 | 324 ± 22 | 50.2 ± 0.9                                                                                               | 19.7 ± 3.0 | 30.5 ± 3.1 | 98.1 ± 6.8                                |
| CE278k (Mussel tissue)           | 436 ± 27                                                                    | 66 ± 32  | 370 ± 17 | 9.8 ± 0.5                                                                                                | 7.3 ± 1.0  | 2.5 ± 1.1  | 99.9 ± 4.6                                |
| CS-M-3 (Dried mushroom powder)   | 445 ± 25                                                                    | 19 ± 31  | 426 ± 19 | 8.7 ± 0.2                                                                                                | 6.2 ± 0.5  | 2.5 ± 0.5  | 99.9 ± 4.5                                |
| GBW 10011 (Wheat)                | 395 ± 25                                                                    | 25 ± 34  | 370 ± 23 | 10.6 ± 0.9                                                                                               | 8.0 ± 0.8  | 2.6 ± 1.2  | 99.6 ± 6.2                                |
| SRM 3280 (Multivitamin tablets)  | 129 ± 7                                                                     | 3 ± 9    | 126 ± 6  | 15.9 ± 0.9                                                                                               | 13.2 ± 0.8 | 2.7 ± 1.2  | 99.6 ± 4.8                                |
| Food and supplement samples      |                                                                             |          |          |                                                                                                          |            |            |                                           |
| Fish tissue 1                    | 537 ± 33                                                                    | 175 ± 39 | 362 ± 21 | 20.3 ± 1.3                                                                                               | 14.0 ± 1.5 | 6.3 ± 2.0  | 99.7 ± 5.8                                |
| Fish tissue 2                    | 495 ± 24                                                                    | 177 ± 31 | 318 ± 19 | 18.4 ± 1.1                                                                                               | 13.1 ± 0.8 | 5.3 ± 1.4  | 99.7 ± 6.0                                |
| Mushroom 1                       | 409 ± 27                                                                    | 2 ± 37   | 407 ± 26 | 8.2 ± 0.9                                                                                                | 6.2 ± 0.6  | 2.0 ± 1.1  | 99.9 ± 6.4                                |
| Mushroom 2                       | 464 ± 30                                                                    | 67 ± 41  | 397 ± 28 | 19.3 ± 0.8                                                                                               | 16.7 ± 0.9 | 2.6 ± 1.2  | 99.9 ± 7.1                                |
| Mushroom 3                       | 438 ± 31                                                                    | 34 ± 40  | 404 ± 25 | 24.3 ± 1.1                                                                                               | 20.2 ± 0.8 | 4.1 ± 1.4  | 99.8 ± 6.2                                |
| Mushroom 4                       | 451 ± 29                                                                    | 38 ± 38  | 413 ± 24 | 15.9 ± 0.8                                                                                               | 14.2 ± 0.5 | 1.7 ± 0.9  | 99.9 ± 5.8                                |
| Supplement 1                     | 693 ± 51                                                                    | 353 ± 53 | 340 ± 16 | 9.2 ± 0.8                                                                                                | 6.0 ± 0.9  | 3.2 ± 1.2  | 99.8 ± 4.7                                |
| Supplement 2                     | 636 ± 43                                                                    | 346 ± 46 | 290 ± 16 | 8.7 ± 1.1                                                                                                | 5.8 ± 0.8  | 2.9 ± 1.4  | 99.8 ± 5.5                                |
| Supplement 3                     | 164 ± 7                                                                     | 68 ± 8   | 96 ± 4   | 8.3 ± 0.6                                                                                                | 6.1 ± 0.6  | 2.2 ± 0.9  | 99.5 ± 4.2                                |
| Pooled combustion efficiency (%) |                                                                             |          |          |                                                                                                          |            |            | 99.7 ± 5.7                                |

<sup>a</sup>SD is the standard deviation calculated from n = 3 repeated measurements;

$$\frac{m_{TOC \text{ food sample}} - m_{TOC \text{ suspension}}}{m_{TOC \text{ food sample}}} \times 100$$

<sup>b</sup>Combustion efficiency (%) was calculated as for 50 mg sample and 500 mL flask combustion.

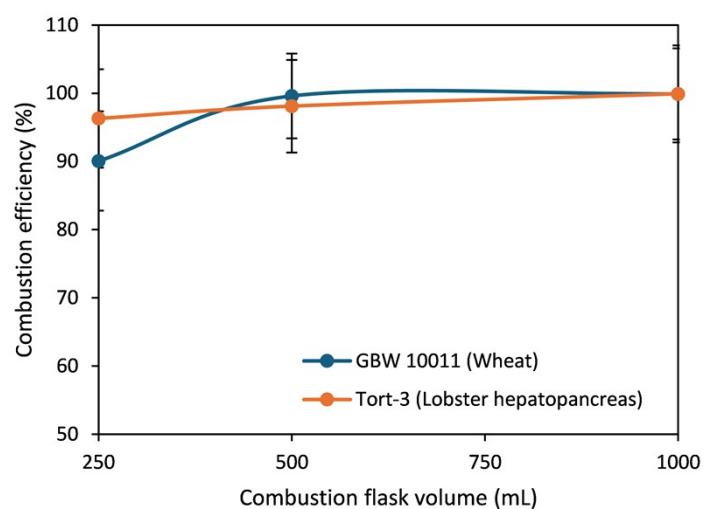

**Fig. S1.** Combustion efficiency (%) for 50 mg of GBW 10011 (Wheat) and TORT-3 (Lobster hepatopancreas) in flasks of 250, 500 and 1000 mL. Error bars correspond to relative standard deviation for  $n = 3$  repeated measurements

## 2. Calibration curves obtained by SSETV- $\mu$ CCP-OES method for different number of integrating pixels of the signal over the spectral line profile

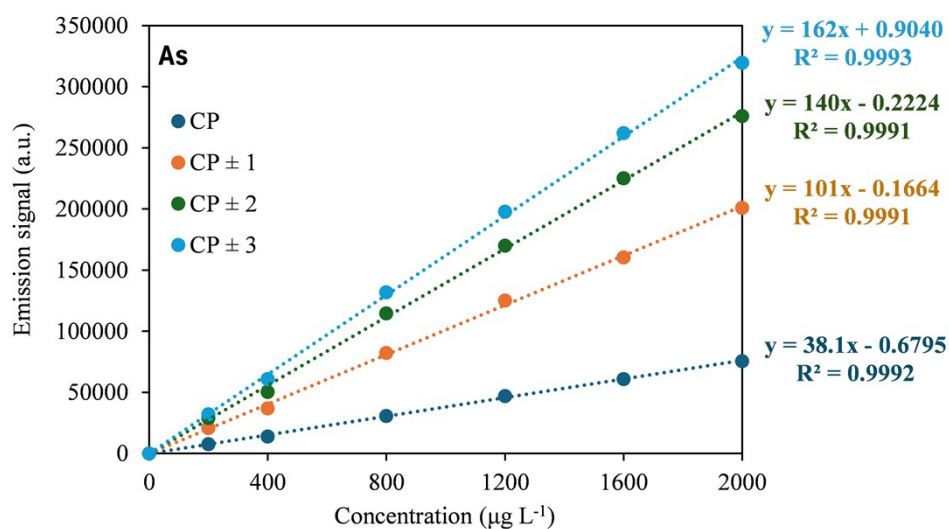

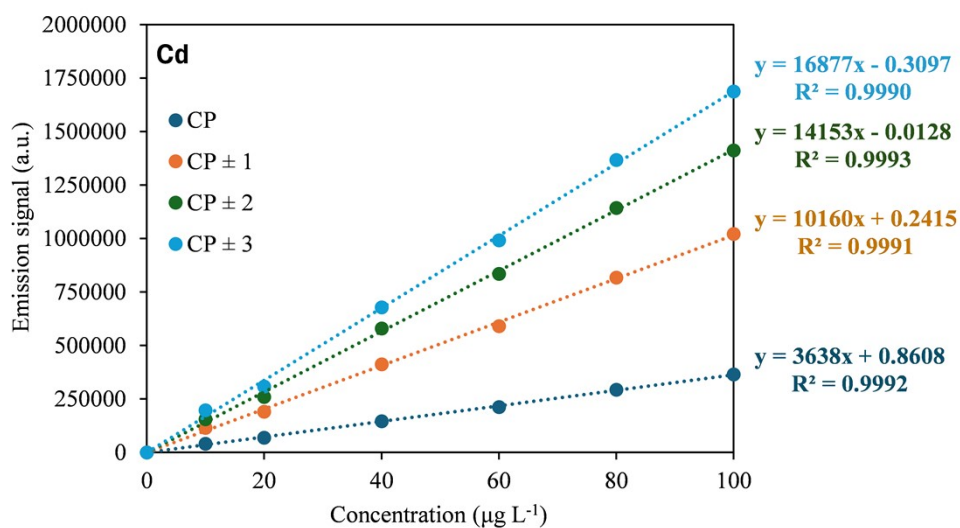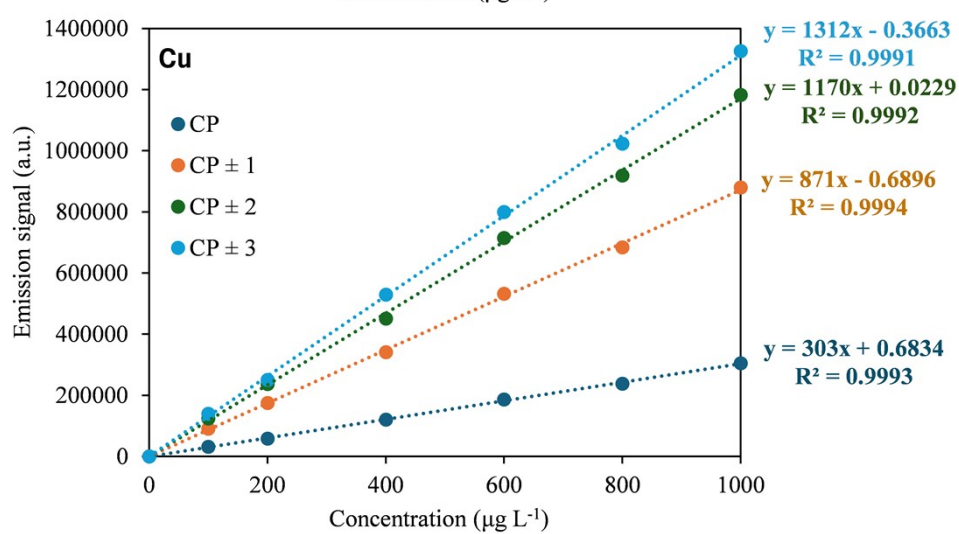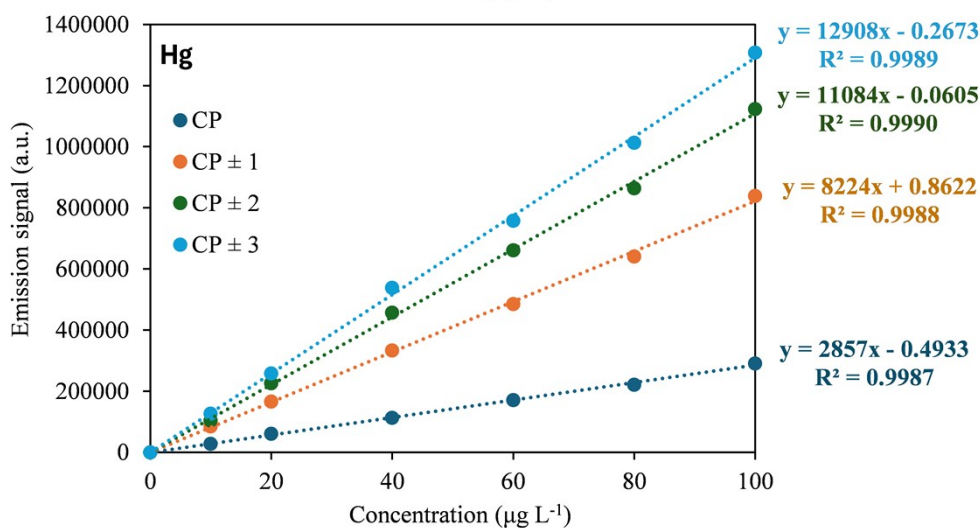

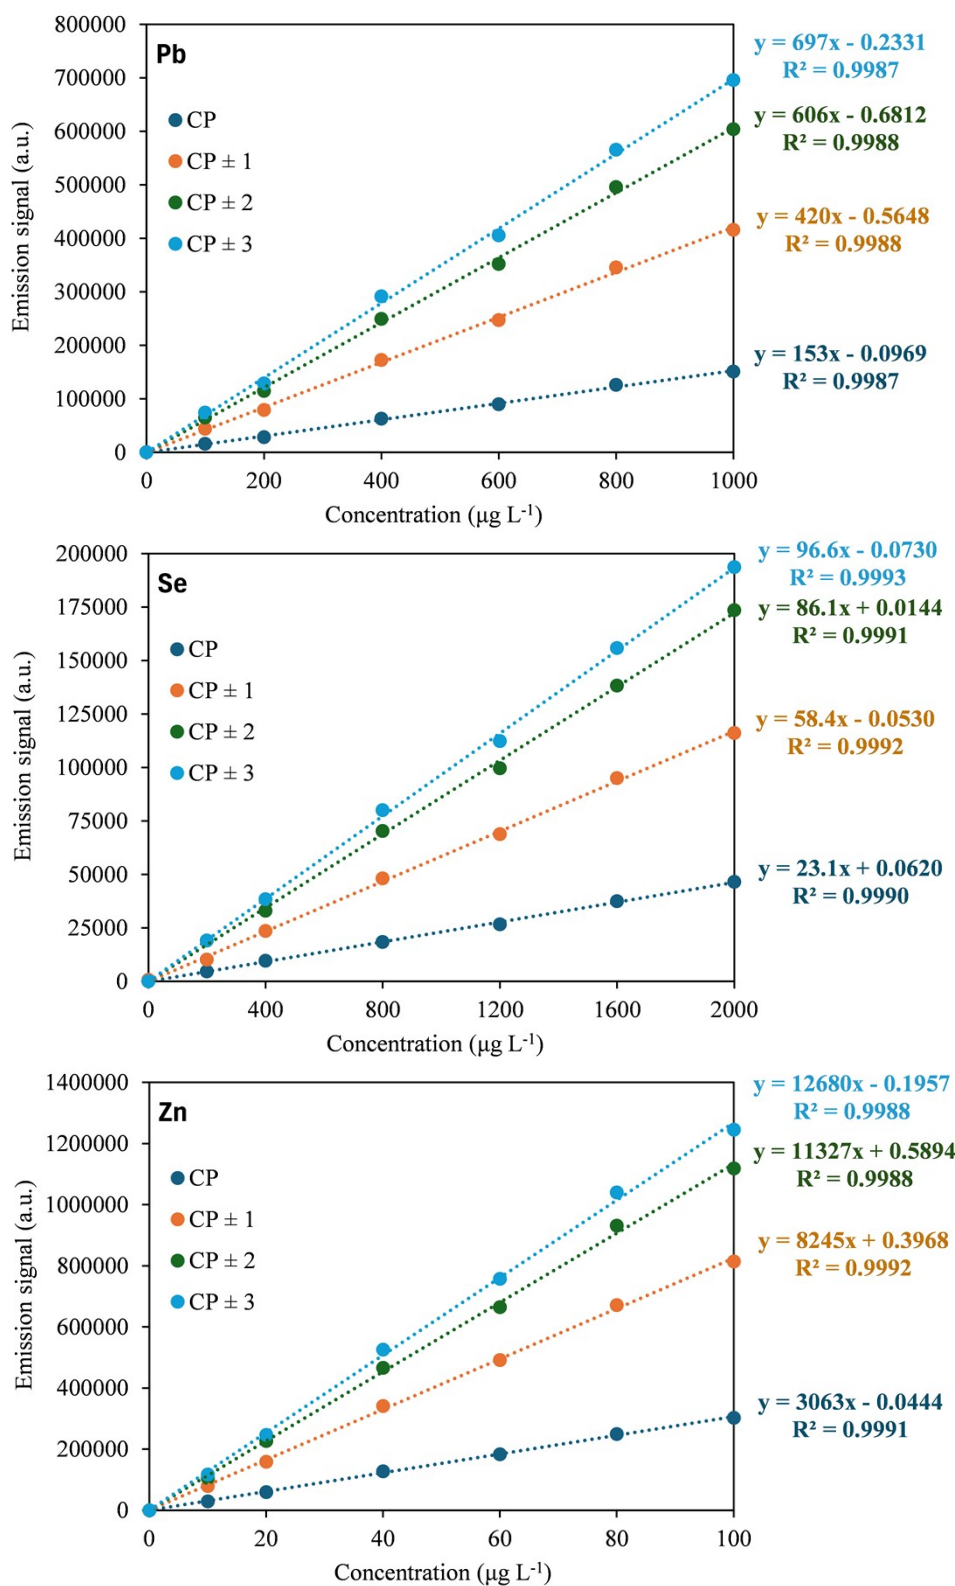

**Fig. S2.** Calibration curves obtained by SSETV- $\mu$ CCP-OES method for different number of pixels used for signal integration over the spectral line profile (CP is the signal corresponding to the Central Pixel of the spectral line,  $\pm 1$ ;  $\pm 2$  and  $\pm 3$  corresponds to signals over the spectral line profile against CP)

### 3. Dependence of signal-to-background ratio, relative standard deviation of the background and LODs *versus* the number of integrating pixels of the signal over the spectral line profile

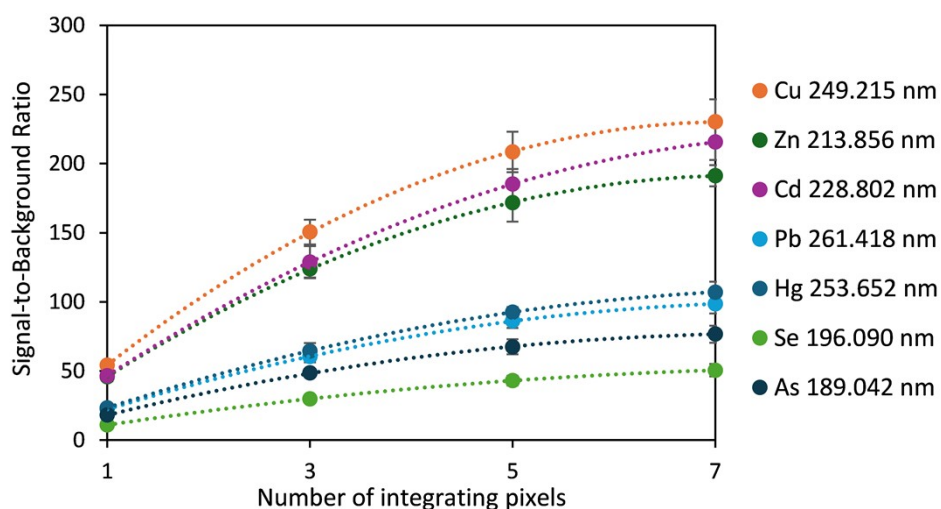

**Fig. S3.** Dependence of SBR in the SSETV- $\mu$ CCP-OES method for different number of integrating pixels of the signal over the spectral profiles at the most sensitive lines of elements. Element concentrations ( $\text{mg L}^{-1}$ ): 0.1 (Cd, Hg and Zn), 1 (Cu, Pb) and 2 (As, Se). Error bars correspond to standard deviation for  $n = 3$  repeated measurements

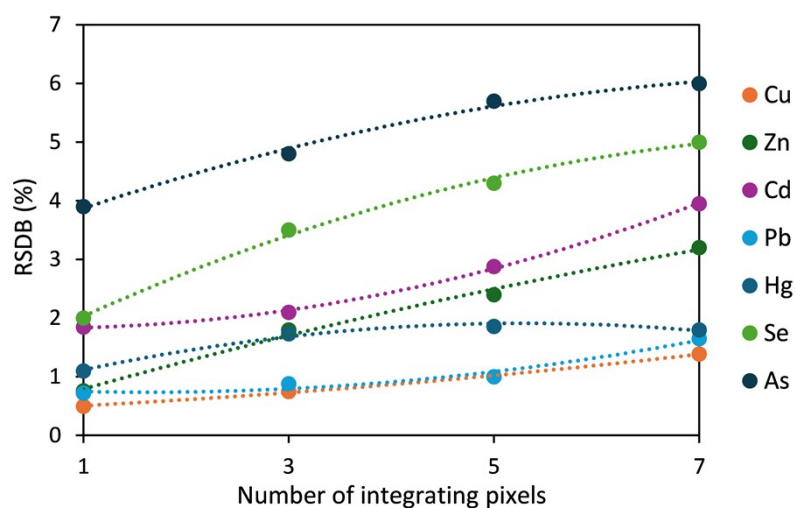

**Fig. S4.** Dependence of RSDB in the SSETV- $\mu$ CCP-OES method for different number of integrating pixels of the signal over the spectral profiles of the most sensitive lines. Element concentrations ( $\text{mg L}^{-1}$ ): 0.1 (Cd, Hg and Zn), 1 (Cu, Pb) and 2 (As, Se)

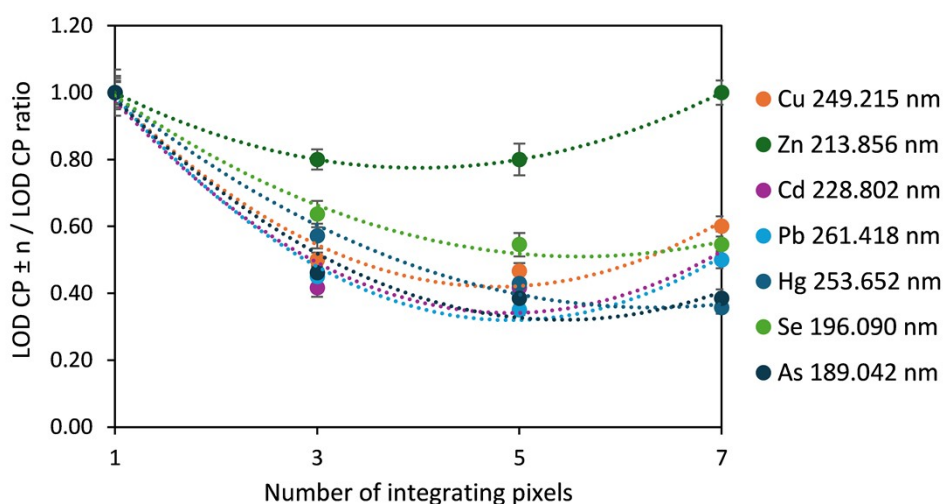

**Fig. S5.** Improvement of instrumental LODs in the SSETV- $\mu$ CCP-OES method *versus* the number of integrating pixels of the signal over the spectral profile of the most sensitive lines. Error bars correspond to standard deviation for  $n = 3$  repeated measurements.

#### 4. Colours of the (OFC)-SSETV- $\mu$ CCP-OES method in comparison with traditional spectrometric methods

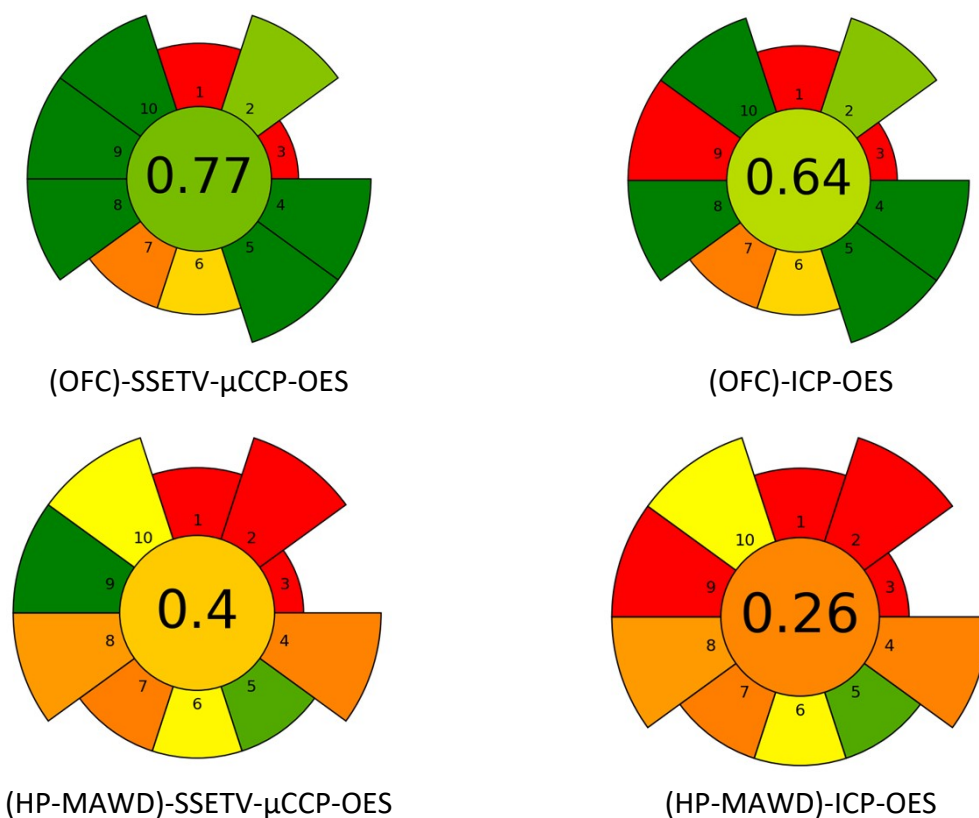

**Fig. S6.** The greenness of the (OFC)-SSETV- $\mu$ CCP-OES method evaluated by the AGREEprep metric in comparison with (OFC)-ICP-OES, (HP-MAWD)-SSETV- $\mu$ CCP-OES and (HP-MAWD)-ICP-OES methods. The assessment criteria, weight and inputs are presented in Table S2.

**Table S2.** Inputs used to assign the AGREEprep scores for the (OFC)-SSETV- $\mu$ CCP-OES method in comparison with (OFC)-ICP-OES, (HP-MAWD)-SSETV- $\mu$ CCP-OES and (HP-MAWD)-ICP-OES

| Assessment criteria                                           | Method                     |                                                                                                      |               |                                                                                         |                                |                                                                                                      |                   |                                                                                         |
|---------------------------------------------------------------|----------------------------|------------------------------------------------------------------------------------------------------|---------------|-----------------------------------------------------------------------------------------|--------------------------------|------------------------------------------------------------------------------------------------------|-------------------|-----------------------------------------------------------------------------------------|
|                                                               | (OFC)-SSETV- $\mu$ CCP-OES |                                                                                                      | (OFC)-ICP-OES |                                                                                         | (HP-MAWD)-SSETV- $\mu$ CCP-OES |                                                                                                      | (HP-MAWD)-ICP-OES |                                                                                         |
|                                                               | Weight                     | Input                                                                                                | Weight        | Input                                                                                   | Weight                         | Input                                                                                                | Weight            | Input                                                                                   |
| 1. Sample preparation placement                               | 3                          | Ex-situ (in the lab)                                                                                 | 3             | Ex-situ (in the lab)                                                                    | 3                              | Ex-situ (in the lab)                                                                                 | 3                 | Ex-situ (in the lab)                                                                    |
| 2. Hazardous materials                                        | 5                          | 0.063 g concentrated HNO <sub>3</sub>                                                                | 5             | 0.063 g concentrated HNO <sub>3</sub>                                                   | 5                              | 9 g HNO <sub>3</sub> + 1 g H <sub>2</sub> O <sub>2</sub>                                             | 5                 | 9 g HNO <sub>3</sub> + 1 g H <sub>2</sub> O <sub>2</sub>                                |
| 3. Sustainability, renewability, and reusability of materials | 1                          | < 25% of reagents and materials are sustainable or renewable, but can only be used once              | 1             | < 25% of reagents and materials are sustainable or renewable, but can only be used once | 1                              | < 25% of reagents and materials are sustainable or renewable, but can only be used once              | 1                 | < 25% of reagents and materials are sustainable or renewable, but can only be used once |
| 4. Waste                                                      | 5                          | 0.063 g concentrated HNO <sub>3</sub>                                                                | 5             | 0.063 g concentrated HNO <sub>3</sub>                                                   | 5                              | 9 g HNO <sub>3</sub> + 1 g H <sub>2</sub> O <sub>2</sub>                                             | 5                 | 9 g HNO <sub>3</sub> + 1 g H <sub>2</sub> O <sub>2</sub>                                |
| 5. Size economy of the samples                                | 5                          | 0.050 g sample                                                                                       | 5             | 0.050 g sample                                                                          | 3                              | 0.3 g sample                                                                                         | 3                 | 0.3 g sample                                                                            |
| 6. Sample throughput                                          | 3                          | 6 samples/h                                                                                          | 3             | 6 samples/h                                                                             | 3                              | 8 samples/h                                                                                          | 3                 | 8 samples/h                                                                             |
| 7. Integration and automation                                 | 3                          | 2 steps in the sample preparation, manual system                                                     | 3             | 2 steps in the sample preparation, manual system                                        | 3                              | 2 steps in the sample preparation, manual system                                                     | 3                 | 2 steps in the sample preparation, manual system                                        |
| 8. Energy consumption                                         | 5                          | ~ 0 Wh for OFC                                                                                       | 5             | ~ 0 Wh for OFC                                                                          | 5                              | ~ 150 Wh for sample digestion                                                                        | 5                 | ~ 150 Wh for sample digestion                                                           |
| 9. Post-sample preparation configuration for analysis         | 5                          | Simple, readily available detection: miniaturized instrumentation with low energy and Ar consumption | 5             | Advanced OES with high energy and Ar consumption: ICP-OES                               | 5                              | Simple, readily available detection: miniaturized instrumentation with low energy and Ar consumption | 5                 | Advanced OES with high energy and Ar consumption: ICP-OES                               |
| 10. Operator's safety                                         | 5                          | No hazards or no exposure                                                                            | 5             | No hazards or no exposure                                                               | 5                              | 2 Hazards                                                                                            | 5                 | 2 Hazards                                                                               |



**Table S3.** Evaluation tables by the RGB 12 algorithm for the (OFC)-SSETV- $\mu$ CCP-OES method in comparison with (HP-MAWD)-ICP-OES, (HP-MAWD)-GFAAS and TDAAS

| RED PRINCIPLES<br>(analytical performance) |               |                            | R1: Scope of application | R2: LOD and LOQ                |                                |       | R3: Precision        |                        |       | R4: Accuracy       |              |       |
|--------------------------------------------|---------------|----------------------------|--------------------------|--------------------------------|--------------------------------|-------|----------------------|------------------------|-------|--------------------|--------------|-------|
|                                            | Method number | Method name                | 0-100                    | LOD                            | LOQ                            | 0-100 | RSD% (repeatability) | RSD% (reproducibility) | 0-100 | Relative error (%) | Recovery (%) | 0-100 |
|                                            | 1             | (OFC)-SSETV- $\mu$ CCP-OES | 75                       | 0.01-1.2 mg kg <sup>-1</sup>   | 0.03-4.0 mg kg <sup>-1</sup>   | 70    | 4.6-14.5             | -                      | 100   | -                  | 92-113       | 100   |
|                                            | 2             | (HP-MAWD)-ICP-OES          | 75                       | 0.04-0.85 mg kg <sup>-1</sup>  | 0.13-2.80 mg kg <sup>-1</sup>  | 70    | 6.7-13.7             | -                      | 100   | -                  | 91-111       | 100   |
|                                            | 3             | (HP-MAWD)-GFAAS            | 75                       | 0.006-0.03 mg kg <sup>-1</sup> | 0.020-0.10 mg kg <sup>-1</sup> | 100   | 4.1-11.8             | -                      | 100   | -                  | 85-107       | 100   |
|                                            | 4             | TDAAS                      | 50                       | 0.004 mg kg <sup>-1</sup>      | 0.013 mg kg <sup>-1</sup>      | 100   | 24                   | -                      | 80    | -                  | 92-108       | 100   |

| GREEN PRINCIPLES<br>(green chemistry) |               |                            | G1: Toxicity of reagents (impact and biodegradation) |       | G2: Amount of reagents and waste |                  |       | G3: Consumption of energy and other media | G4: Direct impacts (safety, use of animals and GMOs) |                         |                                    |                                |
|---------------------------------------|---------------|----------------------------|------------------------------------------------------|-------|----------------------------------|------------------|-------|-------------------------------------------|------------------------------------------------------|-------------------------|------------------------------------|--------------------------------|
|                                       | Method number | Method name                | Total number of pictograms                           | 0-100 | Reagent consumption              | Waste production | 0-100 | 1-100                                     | Occupational hazards                                 | Safety of users (0-100) | Use of animals (0 if no, 1 if yes) | Use of GMO (0 if no, 1 if yes) |
|                                       | 1             | (OFC)-SSETV- $\mu$ CCP-OES | 3                                                    | 75    | 0.063                            | 0.063            | 100   | 100                                       | -                                                    | 100                     | 0                                  | 0                              |
|                                       | 2             | (HP-MAWD)-ICP-OES          | 9                                                    | 50    | 20                               | 20               | 50    | 75                                        | -                                                    | 100                     | 0                                  | 0                              |
|                                       | 3             | (HP-MAWD)-GFAAS            | 3                                                    | 75    | 10                               | 10               | 60    | 90                                        | -                                                    | 100                     | 0                                  | 0                              |
|                                       | 4             | TDAAS                      | 0                                                    | 100   | 0                                | 0                | 100   | 90                                        | -                                                    | 100                     | 0                                  | 0                              |

| BLUE PRINCIPLES<br>(practical side) |               |                            | B1: Cost-efficiency |       | B2: Time-efficiency |       | B3: Requirements   |                            |                                                               | B4: Operational simplicity |                                        |                     |
|-------------------------------------|---------------|----------------------------|---------------------|-------|---------------------|-------|--------------------|----------------------------|---------------------------------------------------------------|----------------------------|----------------------------------------|---------------------|
|                                     | Method number | Method name                | Total cost          | 0-100 | Speed of analysis   | 0-100 | Sample consumption | Sample consumption (0-100) | Other needs: advanced instruments, skills, facilities (0-100) | Miniaturization (0-100)    | Integration and automatization (0-100) | Portability (0-100) |
|                                     | 1             | (OFC)-SSETV- $\mu$ CCP-OES | Very low            | 100   | High                | 100   | 0.05 g             | 100                        | 100                                                           | 100                        | 75                                     | 100                 |
|                                     | 2             | (HP-MAWD)-ICP-OES          | High                | 50    | High                | 100   | 0.3 g              | 70                         | 50                                                            | 70                         | 100                                    | 70                  |
|                                     | 3             | (HP-MAWD)-GFAAS            | Medium              | 60    | Medium              | 75    | 0.3 g              | 70                         | 70                                                            | 70                         | 100                                    | 70                  |
|                                     | 4             | TDAAS                      | Medium              | 75    | Medium              | 60    | 0.2 g              | 80                         | 100                                                           | 80                         | 100                                    | 70                  |

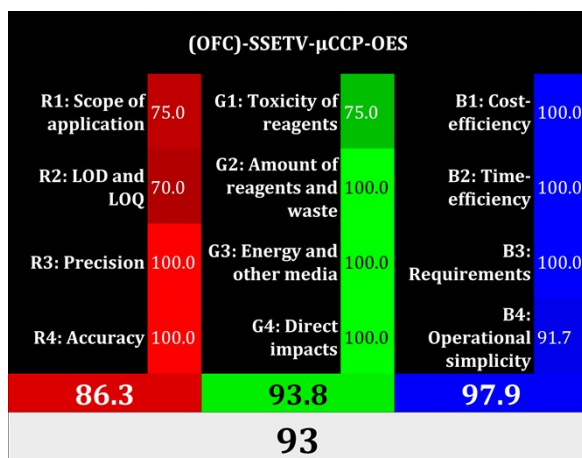

(OFC)-SSETV- $\mu$ CCP-OES

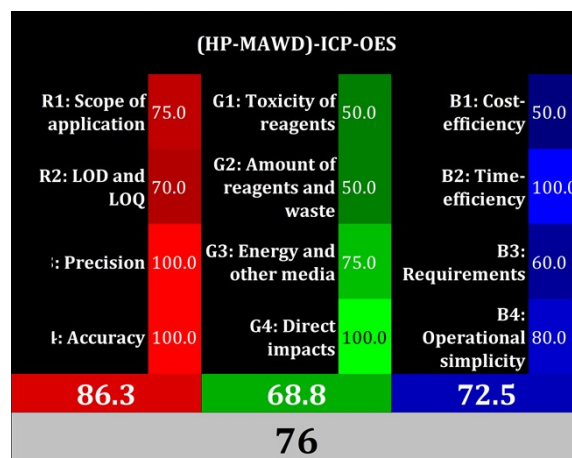

(HP-MAWD)-ICP-OES

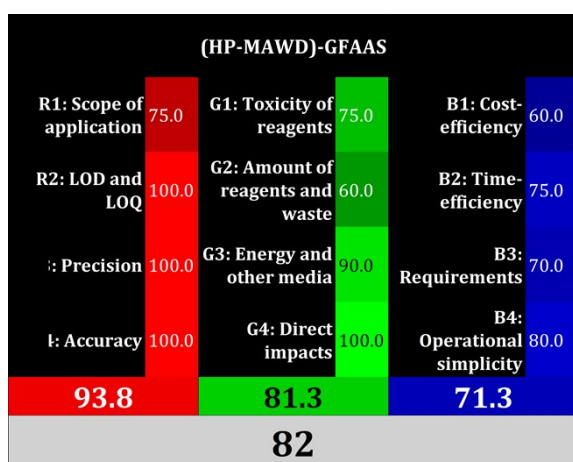

(HP-MAWD)-GFAAS

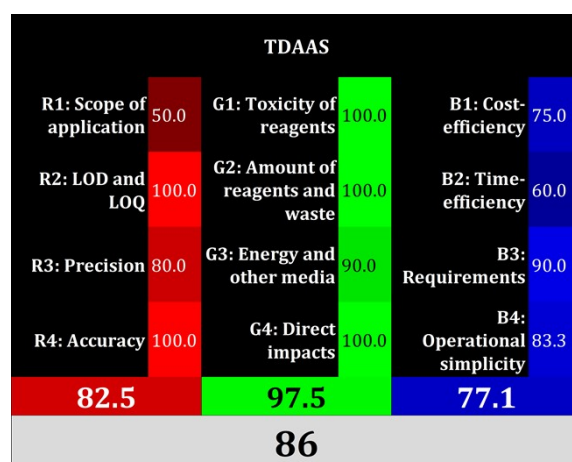

TDAAS

**Fig. S7.** The colours of the (OFC)-SSETV- $\mu$ CCP-OES method evaluated by the RGB 12 algorithm in comparison with (HP-MAWD)-ICP-OES, (HP-MAWD)-GFAAS and TDAAS methods. The considered inputs are illustrated in Table S3.
